# Supplementary material for: ACBE, a new base editor for simultaneous C-to-T and A-to-G substitutions in mammalian systems
Source: PubMed Central journal article supplement (PMC7510086; doi:10.1186/s12915-020-00866-5), 2020-09-23
Supplement: 12915_2020_866_MOESM1_ESM.pdf [file 12915_2020_866_MOESM1_ESM.pdf]

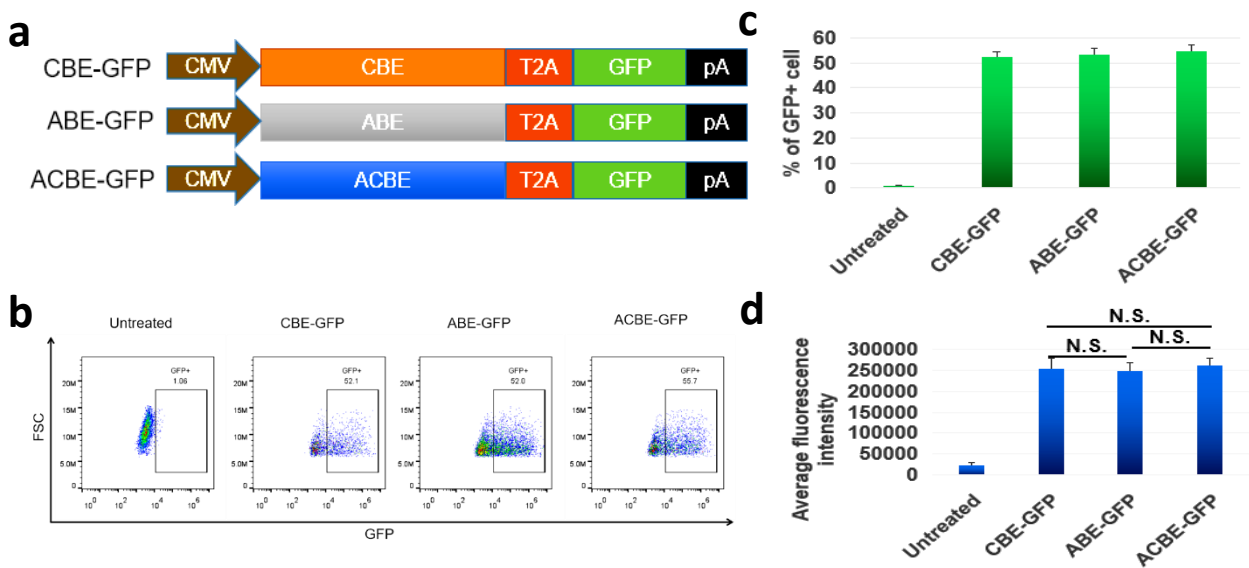

**Figure. S1 Detecting the expression of base editors.** (a) Schematic structure of base editor fusing to GFP with the T2A. The expression of GFP indicated the expression of the fused base editor. (b) Frequency of GFP<sup>+</sup> cells transfected with plasmid CBE-GFP, ABE-GFP and ACBE-GFP, respectively were quantified by flow cytometry. Untreated cell sample served as the negative control. (c) Summary of the GFP<sup>+</sup> frequencies in (c) of three independent repeat experiments. The values and error bars showed the mean  $\pm$  s.e.m. (d) Average fluorescence intensity of GFP<sup>+</sup> cells transfected with plasmid CBE-GFP, ABE-GFP and ACBE-GFP indicated the expression intensity of corresponding base editor. N.S., not significant ( $P > 0.05$ , unpaired two tailed t-test).

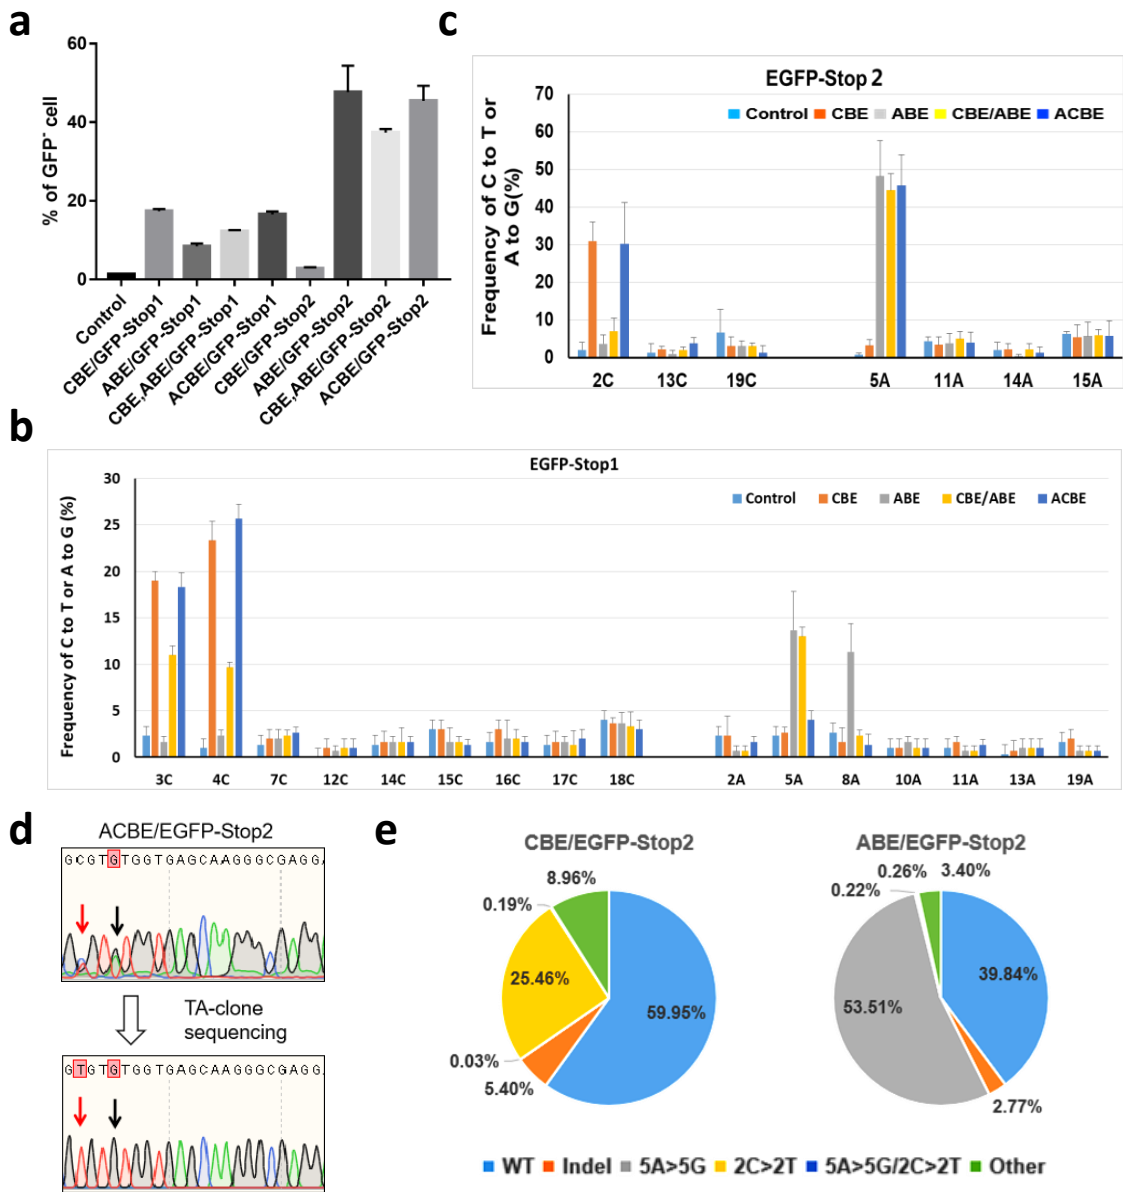

**Figure S2. The ACBE system mediated heterologous C-to-T plus A-to-G substitutions in HEK293-EGFP cells.** (a) Summary of flow cytometry results of HEK293-EGFP cells transfected CBE, ABE, CBE+ABE, and ACBE with EGFP-Stop1 and EGFP-Stop2, respectively. Values and error bars indicate mean  $\pm$  s.e.m. of three independent experiments. An untreated cell sample served as control. (b, c) Summary of base editing patterns and efficiencies of all C and A in EGFP-Stop1 (b) and EGFP-Stop2 (c) targeting sites(n=3). Values and error bars indicate mean  $\pm$  s.e.m. of three independent experiments. Control was untransfected cell sample (d) Represented sanger sequencing results of TA-cloning for ACBE. (e) Summary of mutation patterns and efficiencies of cells transfected CBE or ABE with EGFP-Stop2. The result was based on the representative amplicon sequencing(n=2).

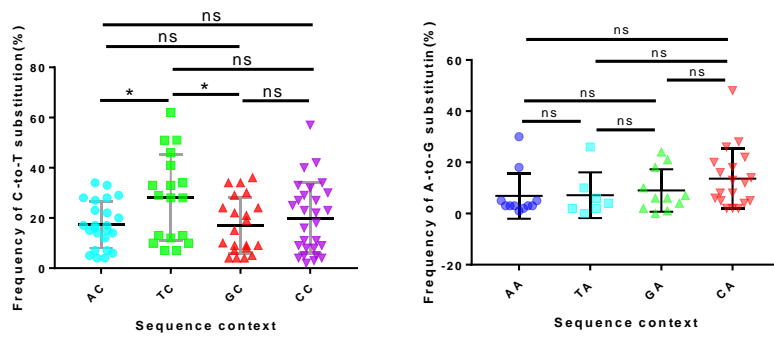

**Figure S3. The preference analysis of ACBE.**

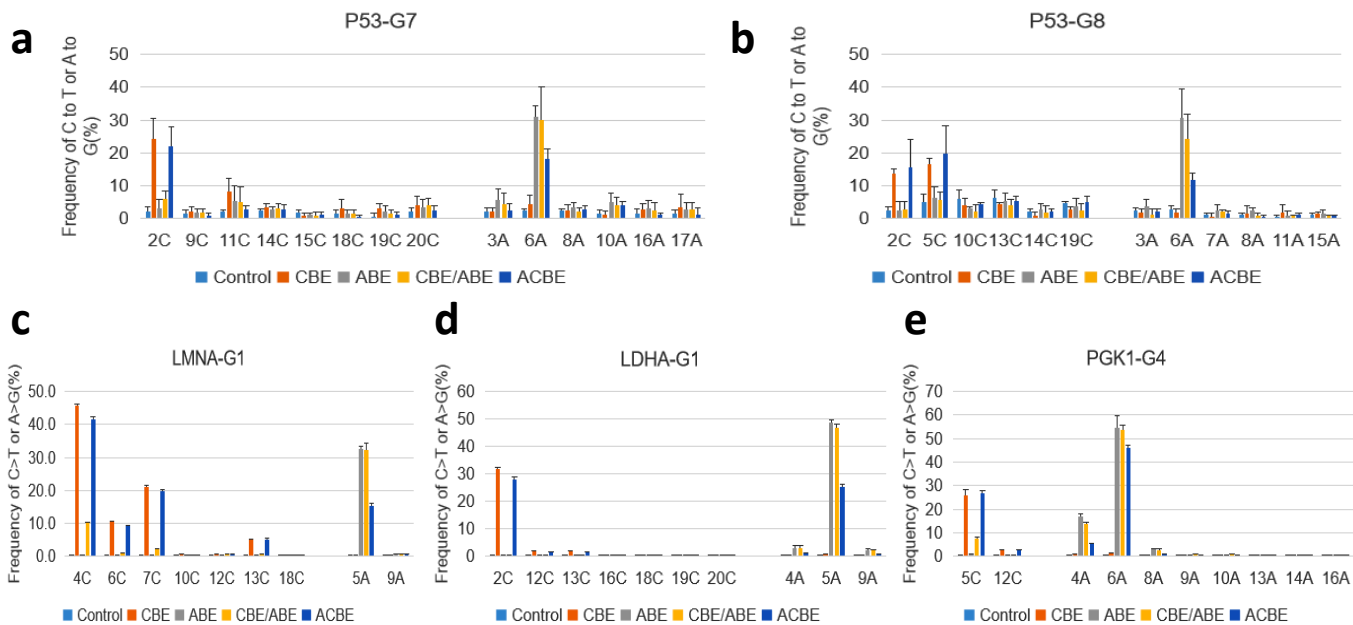

**Figure S4. Comparison of different base editor-mediated base editing patterns and efficiencies of all C and A in *P53-G7* (a), *P53-G8* (b), *LMNA-G1* (c), *LDHA-G1* (d) and *PGK1-G1* (e) targeting sites. (a, b) The base editing frequency was quantified from the results of Sanger sequencing with EditR. (c, d, e) The base editing frequency was quantified from the results of amplicon sequencing. The values and error bars above indicate mean  $\pm$  s.e.m. of three independent experiments. An untreated cell sample served as control for the loci.**

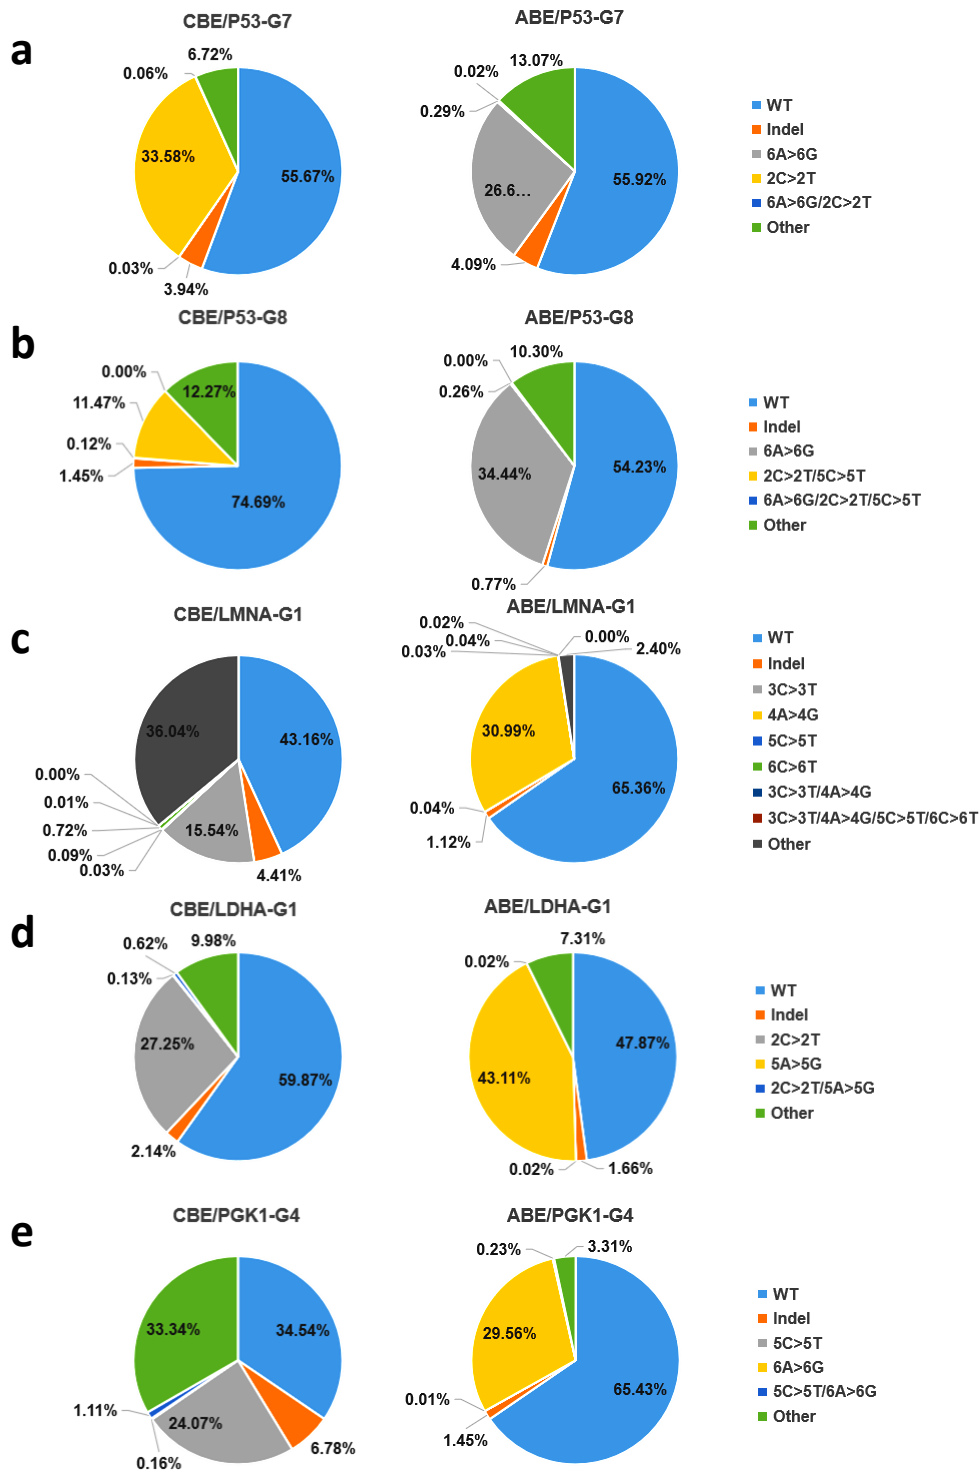

**Figure S5. Summary of mutation patterns and efficiencies of cells transfected CBE or ABE with *P53-G7* (a), *P53-G8* (b), *LMNA-G1* (c), *LDHA-G1* (d) and *PGK1-G4* (e), respectively.**

The ratio of different mutation patterns were calculated basing on the reads from NGS of amplicons.

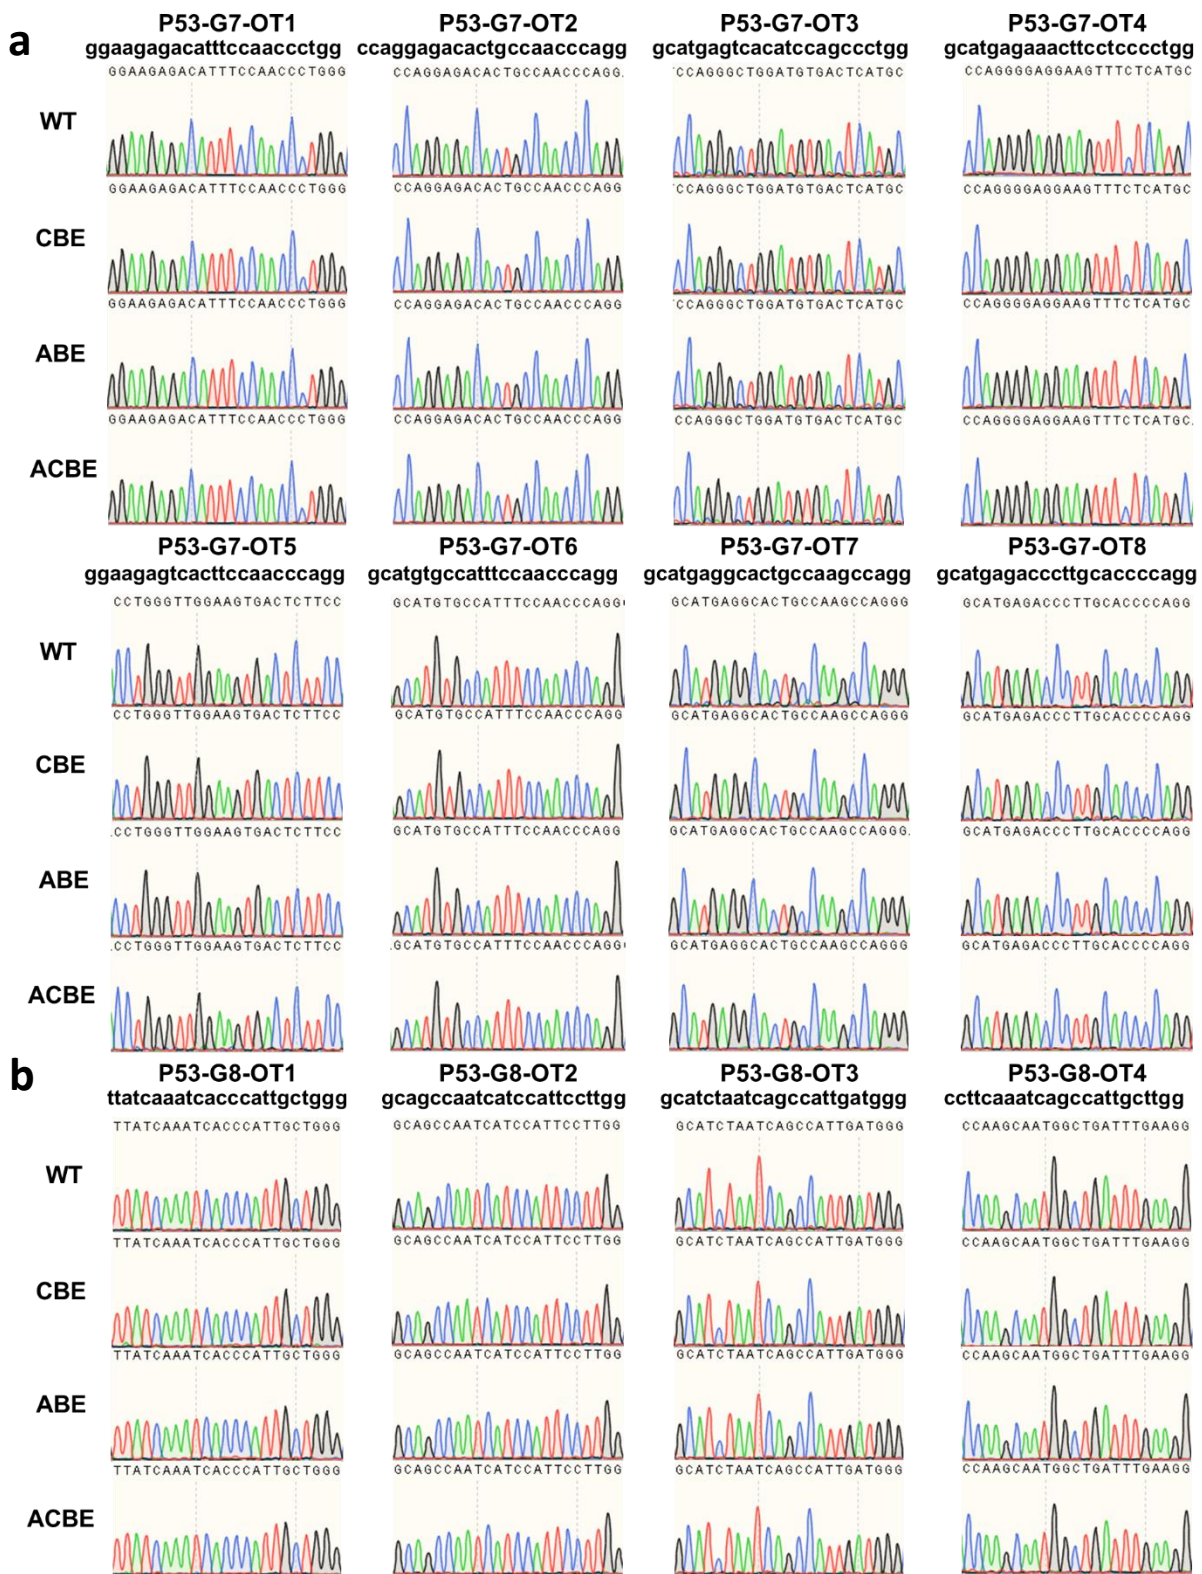

**Figure S6. Off-target analysis of different base editing system. (a)** Sanger sequencing results of 8 potential off-target sites of *P53-G7*. **(b)** Sanger sequencing results of 4 potential off-target sites of *P53-G8*.



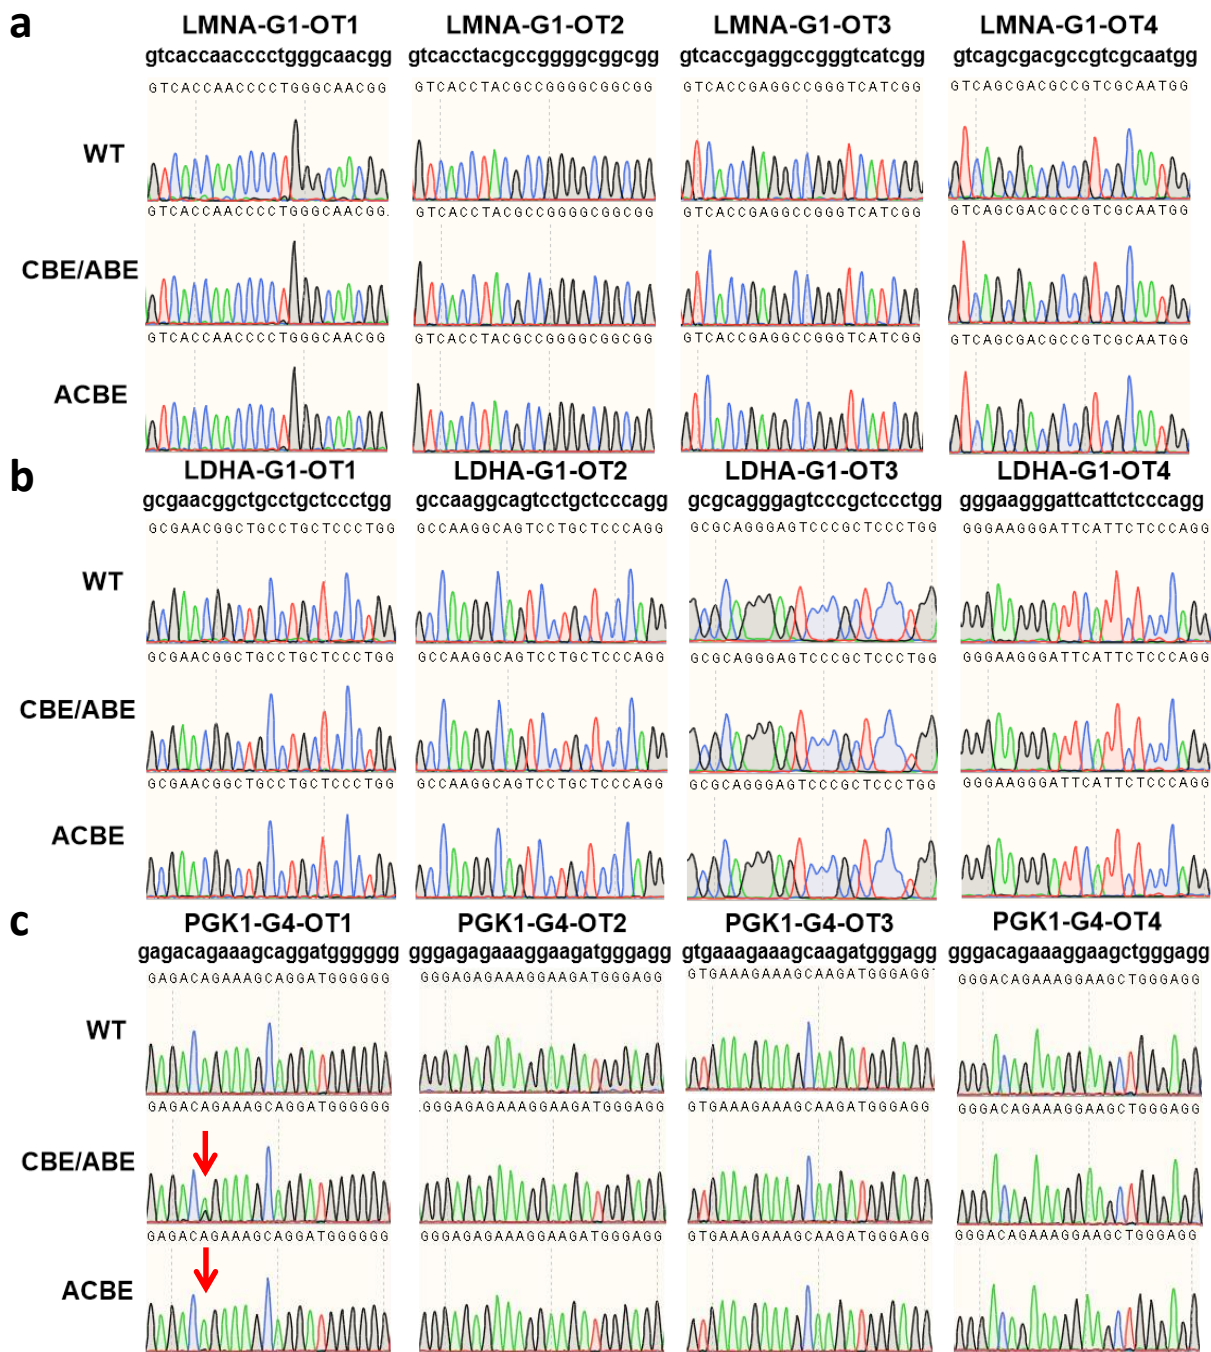

**Figure S7. Off-target analysis of ACBE system.** (a, b, c) Sanger sequencing results of 4 potential off-target sites each for *LMNA-G1*, *LDHA-G1* and *PGK1-G4*. Red arrow indicated the off-target effect.

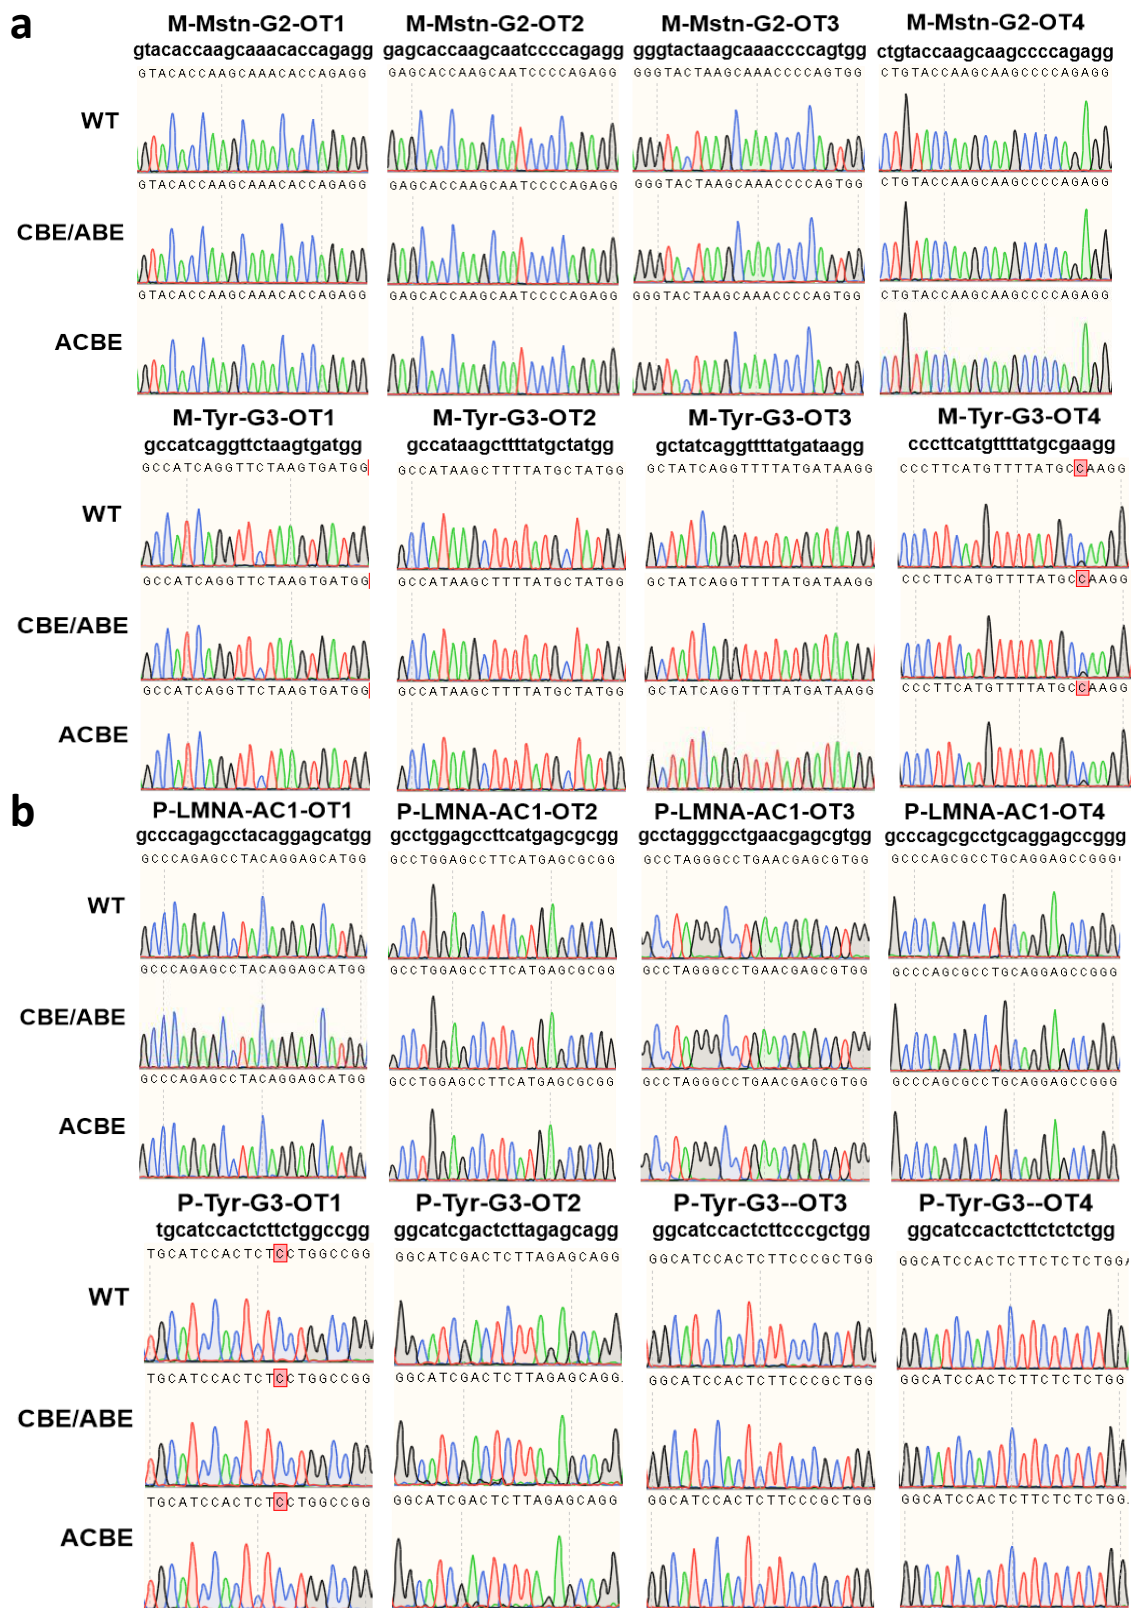

**Figure S8. Off-target analysis of ACBE system in MEFs and PFFs (a)** Sanger sequencing results of 4 potential off-target sites each for *M-Mstn-G2* and *M-Tyr-G3*. **(b)** Sanger sequencing results of 4 potential off-target sites each for *P-LMNA-AC1* and *P-Tyr-G3*. Different peak represents different base.
