# Supplementary material for: ACBE, a new base editor for simultaneous C-to-T and A-to-G substitutions in mammalian systems
Source: PubMed Central journal article supplement (PMC7510086; doi:10.1186/s12915-020-00866-5), 2020-09-23
Supplement: 12915_2020_866_MOESM2_ESM.pdf [file 12915_2020_866_MOESM2_ESM.pdf]

|    | Name of sgRNA | Sequence                |    | Name of sgRNA | Sequence                 |
|----|---------------|-------------------------|----|---------------|--------------------------|
| 1  | P53-G1        | gcaagaaaaagaaataatgaGGG | 29 | PGK1-G7       | ccacctgttgaatgaaagccAGG  |
| 2  | P53-G2        | gctaggaagaggcaaggaaAGG  | 30 | PGK1-G8       | acctccaggagctccaacTGG    |
| 3  | P53-G3        | gacagaagatgacaggggccAGG | 31 | PGK1-G9       | cataccgccccaggatggccAGG  |
| 4  | P53-G4        | gatcaaaataaagggtgggtCGG | 32 | PGK1-G10      | gactcaccatccagccagcAGG   |
| 5  | P53-G5        | ggacaaaggtccggaagtTGG   | 33 | PGK1-G11      | gctaagcagattgtgtggaaTGG  |
| 6  | P53-G6        | ggtcagaggcaagcagaggTGG  | 34 | PGK1-G12      | gtagaaatattttagtataAGG   |
| 7  | P53-G7        | gcatgagacacttcaaccTGG   | 35 | PGK1-G13      | gtctacaaaaaaaaaattagcTGG |
| 8  | P53-G8        | gcatcaaatcatcattgctTGG  | 36 | PGK1-G14      | gatgattattgggtggaaTGG    |
| 9  | P53-G9        | ctccatggcagtgaccggaaAGG | 37 | LMNA-G1       | gtcaccgacgccggggcaaaAGG  |
| 10 | P53-G10       | atccattgcttgggacggcaAGG | 38 | LMNA-G2       | gaacctgagtcaccgacgccGGG  |
| 11 | P53-G11       | aaacatcttgttgagggcagGGG | 39 | LMNA-G3       | ggtctccatggccggcaggtTGG  |
| 12 | P53-G12       | gatggccatggcgccgacgcGGG | 40 | LMNA-G4       | caectgggtcctgagccgcTGG   |
| 13 | P53-G13       | gccgccggtgtaggagctgcTGG | 41 | AAVS1-G1      | getggcatccagactgctcTGG   |
| 14 | P53-G14       | ggttccacaggtctctgctAGG  | 42 | AAVS1-G2      | gctgcacccagctctaaggAGG   |
| 15 | P53-G15       | gccccctagcagagacctgtGGG | 43 | CTNNB1-G1     | attacaggtgggtgtaataAGG   |
| 16 | LDHA-G1       | gcgaagggattcctgctcccGGG | 44 | CTNNB1-G2     | cttacccaagcatttaccAGG    |
| 17 | LDHA-G2       | gcagaagaatcgcttaaacTGG  | 45 | CTNNB1-G3     | ttaccagcttctacaatagcCGG  |
| 18 | LDHA-G3       | gctgattataatcttctaaAGG  | 46 | M-Mstn-G1     | gatcagtacgacgtccagaGGG   |
| 19 | LDHA-G4       | tacctcattaagatactgaTGG  | 47 | M-Mstn-G2     | gtgcaccaagcaaacccagAGG   |
| 20 | TDP43-G1      | gctgaaattaggtatttctTGG  | 48 | M-Mstn-G4     | gataatccagtcceatccaaAGG  |
| 21 | TDP43-G2      | gtcaagaaagatcttaagacTGG | 49 | M-TYR-G1      | gacctcagttcccctcaaaGGG   |
| 22 | TDP43-G3      | gtactgaatcacagcttTGG    | 50 | M-TYR-G3      | gccatcaggtttatgcaTGG     |
| 23 | PGK1-G1       | gtcaatgagatgattattgTGG  | 51 | P-Tyr-G1      | gtggccagctctcagccagGGG   |
| 24 | PGK1-G2       | ggccagatagtaatatttAGG   | 52 | P-Tyr-G3      | ggcatcgactcttctgTGG      |
| 25 | PGK1-G3       | ggaacaaaaatggggaacaaTGG | 53 | P-FANCA-G1    | gctttgcaggatcaagcctcgCGG |
| 26 | PGK1-G4       | gggacagaaagcaagatgggAGG | 54 | P-LMNA-AC1    | gcctagagctgcagagcgCGG    |
| 27 | PGK1-G5       | gatactaaagaccagaatagTGG | 55 | P-LMNA-RE     | caectgggtcccagctgcTGG    |
| 28 | PGK1-G6       | acaccgcgggcaggaacaGGG   |    |               |                          |

**Table S1. sgRNAs used in this study.**

| sgRNA     | 1 | 2 | 3 | 4 | 5 | 6 | 7 | 8 | 9 | 10 | 11 | 12 | 13 | 14 | 15 | 16 | 17 | 18 | 19 | 20 |
|-----------|---|---|---|---|---|---|---|---|---|----|----|----|----|----|----|----|----|----|----|----|
| P53-G2    | G | C | T | A | G | G | A | A | A | G  | A  | G  | G  | C  | A  | A  | G  | G  | A  | A  |
| P53-G13   | G | C | C | G | C | C | G | G | T | G  | T  | A  | G  | G  | A  | G  | C  | T  | G  | C  |
| P53-G14   | G | C | T | T | C | C | C | A | C | A  | G  | G  | T  | C  | T  | C  | T  | G  | C  | T  |
| P53-G15   | G | C | C | C | C | T | A | G | C | A  | G  | A  | G  | A  | C  | C  | T  | G  | T  |    |
| LDHA-G4   | T | A | C | C | T | T | C | A | T | T  | A  | A  | G  | A  | T  | A  | C  | T  | G  | A  |
| TDP43-G1  | G | C | T | G | A | A | A | T | T | A  | G  | G  | T  | A  | T  | T  | T  | C  | C  | T  |
| TDP43-G3  | G | T | A | C | T | G | A | A | T | C  | A  | C  | A  | G  | C  | T  | T  | T  | G  | T  |
| PGK1-G2   | G | G | C | C | A | G | A | T | A | G  | T  | T  | A  | A  | T  | A  | T  | T  | T  | T  |
| PGK1-G6   | A | C | A | C | C | G | C | G | C | G  | G  | G  | C  | A  | G  | G  | A  | A  | C  | A  |
| PGK1-G7   | C | C | A | C | C | T | G | T | T | G  | A  | A  | T  | G  | A  | A  | A  | G  | C  | C  |
| PGK1-G8   | A | C | C | T | T | C | C | A | G | G  | A  | G  | C  | T  | C  | C  | A  | A  | A  | C  |
| LDHA-G3   | G | C | T | G | A | T | T | T | A | T  | A  | A  | T  | C  | T  | T  | C  | T  | A  | A  |
| PGK1-G13  | G | T | C | T | A | C | A | A | A | A  | A  | A  | A  | A  | A  | T  | T  | A  | G  | C  |
| LMNA-G3   | G | G | T | C | T | C | C | A | T | G  | G  | C  | C  | G  | G  | C  | A  | T  | T  | G  |
| LMNA-G4   | C | A | C | C | T | G | G | G | C | T  | C  | C  | T  | G  | A  | G  | C  | C  | T  | C  |
| AAVS1-G1  | G | C | T | G | G | C | A | T | C | C  | A  | G  | A  | C  | T  | G  | G  | C  | T  | C  |
| CTNNB1-G2 | C | T | T | A | C | C | C | A | A | G  | C  | A  | T  | T  | T  | T  | C  | A  | C  | C  |
| CTNNB1-G3 | T | T | A | C | C | A | G | C | T | T  | C  | T  | A  | C  | A  | A  | T  | A  | G  | C  |

**Table S2. The nucleotides in positions 4-6 of 18 sgRNAs with only C-to-T conversions mediated by the ACBE system.**
